# Supplementary material for: Iduronate-2-Sulfatase-Regulated Dermatan Sulfate Levels Potentiate the Invasion of Breast Cancer Epithelia through Collagen Matrix
Source: MDPI journal article supplement (doi:10.3390/jcm8101562), 2019-09-30
Supplement: s1 [file s1]

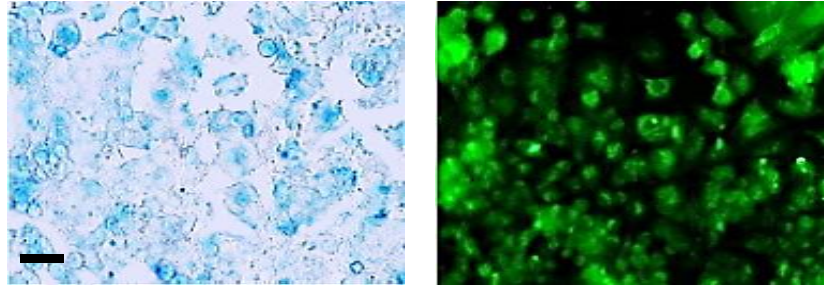

**Figure S1.** Bright field (left) and laser confocal (right) micrographs of the same field of Alcian blue-stained MCF-7 cells cultured on top of 1 mg/mL Type 1 collagen gels. Images show that the levels of green autofluorescence signals correspond to the intensity of Alcian blue staining in the brightfield. Scale bar = 50  $\mu$ m.

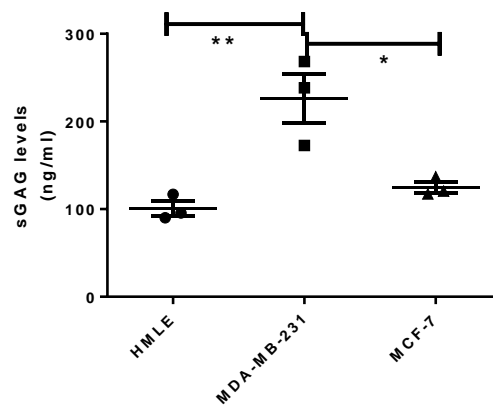

**Figure S2.** Scatter plot of DMMB assay depicting levels of sulfated glycosaminoglycans (GAGs) in HMLE, MCF-7 and MDA-MB-231 cells grown in 3D Type-I collagen scaffolds. (Data is mean  $\pm$  SE of three independent experiments). Significance was measured using one-way ANOVA (\*  $p < 0.05$ , \*\*  $p < 0.01$ ).

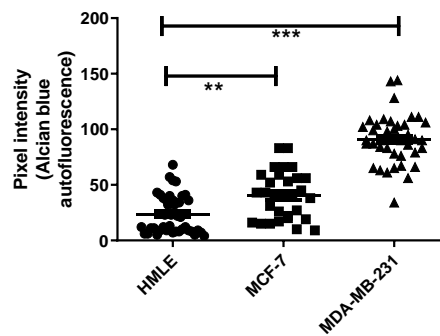

**Figure S3.** Scatter plot showing pixel intensities of Alcian blue autofluorescence in stained HMLE, MCF-7 and MDA-MB-231 cells cultured on top of 1 mg/mL Type 1 collagen gels. Each spot represents autofluorescent signal from single cells from all three independent experiments. Significance was measured using student's t-test (\*\*  $p < 0.01$ , \*\*\*  $p < 0.001$ ).

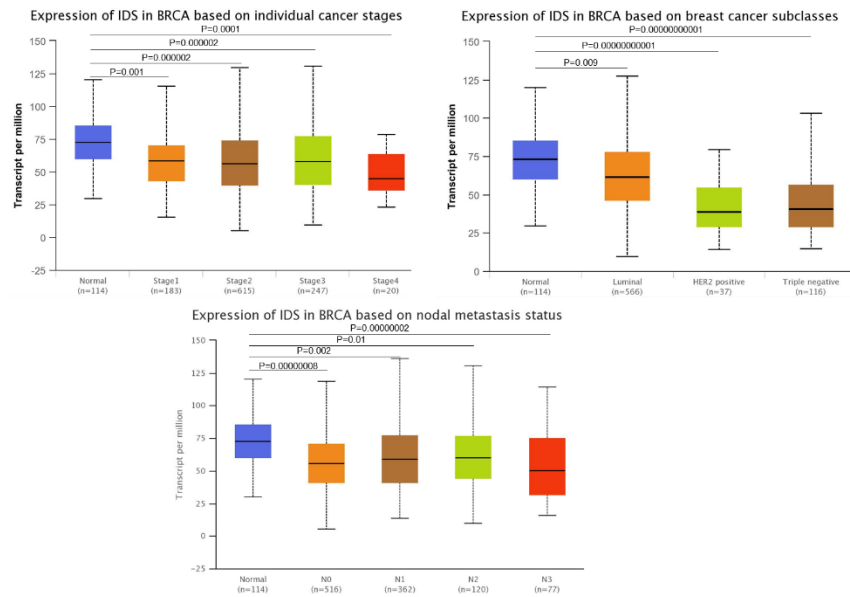

**Figure S4.** Graphs of stage-specific, histotype-specific, and lymph node-metastasis-specific mRNA levels of IDS in breast cancer patients from TCGA presented in its graphical user interface UALCAN.

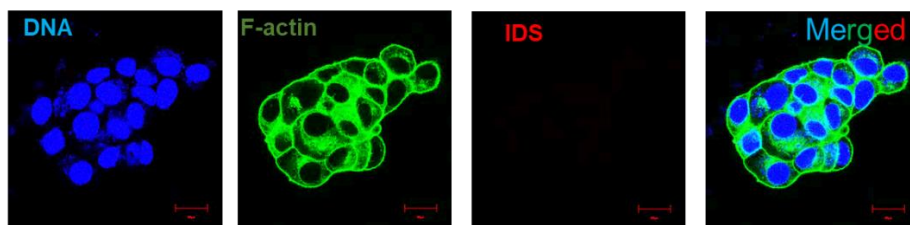

**Figure S5.** Confocal micrographs of MCF-7 cells with no primary antibody (negative control) grown on Type 1 collagen scaffolds and stained for F-actin and DNA, Scale = 20  $\mu$ m.

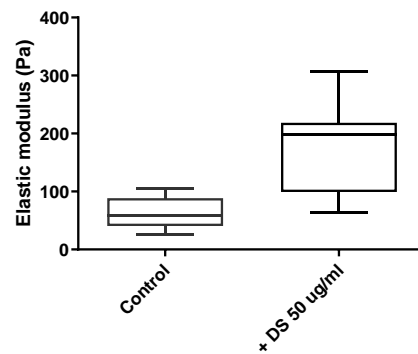

**Figure S6.** Graph showing median elastic modulus of Type 1 collagen measured by atomic force microscopy and its interquartile distribution, when polymerized without and in the presence of 50  $\mu$ g/mL dermatan sulfate (DS).
